# Supplementary material for: A rapid method for detecting protein-nucleic acid interactions by protein induced fluorescence enhancement
Source: PubMed Central journal article supplement (PMC5180085; doi:10.1038/srep39653), 2016-12-23
Supplement: srep39653-s1.pdf [file srep39653-s1.pdf]

## **Supplementary information**

### **A rapid method for detecting protein-nucleic acid interactions by protein induced fluorescence enhancement**

Sona Valuchova, Jaroslav Fulnecek, Alexander P. Petrov, Konstantinos Tripsianes, Karel Riha

Supplementary Figure 1

Supplementary table 1

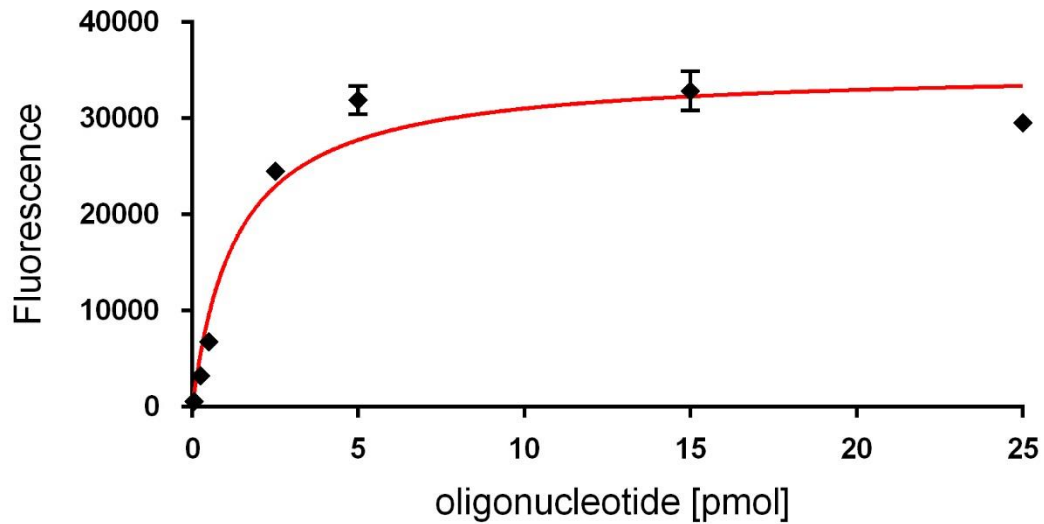

### Supplementary Figure 1

The binding curve of 25 bp oligonucleotide Btn\_25\_f/ Cy3\_25\_r to a microwell plate. Increasing amount of 25 bp biotinylated oligonucleotide was immobilized to a microwell plate in triplicate. Plotted fluorescence represents the average fluorescence signal of triplicate reduced by signal from a well with a binding buffer to correct for background. Standard deviations are indicated. We consider the range of 0.5 – 5 pmol of oligonucleotide suitable for PIFE measurements. The 2.5 pmol concentration of oligonucleotides was used throughout the study as it sufficient fluorescence without saturating the capacity of microplate wells (binding capacity: > 15pmol D-biotin/well).

**Supplementary Table 1.** List of oligonucleotides used in the study

| <b>Primer name</b> | <b>sequence</b>                                                                           |
|--------------------|-------------------------------------------------------------------------------------------|
| Hs80_HL            | ATATGGATCCAGTGC GGTCGGGGAATAAGGCA                                                         |
| Hs80_HR            | ATATGCGGCCGCTTATATCATGTCCAATAAATC                                                         |
| Hs80_DL            | ATATCTCGAGGTCCGAAACCATGTCGTA                                                              |
| Hs80_DR            | ATATGCTAGCTTATATCATGTCCAATAA                                                              |
| Hs70_DL            | ATATGGATCCATGTCAGGGTGGGAGTCATAT                                                           |
| Hs70_DR            | ATATACTAGTTTAGTCCTGGAAGTGCTTGGT                                                           |
| C_f                | [Btn]CACAAACGACCACCTAGATAGAGCCAAGCAGTTTACGTAC<br>CGTCATTCCCTTCCACGTCATCGAGCTACCGTCGTC     |
| C_r                | [Cyanine3]GACGACGGTAGCTCGATGACGTGGAAGGGAATGA<br>CGGTACGTAAACTGCTTGGCTCTATCTAGGTGGTCGTTGTG |
| 1_f                | [Btn]CACAAACGACCACCTAGATAGAGCCAAGCAGTTTACGTAC<br>CGTCATTCCCTTCCACGTCATCGAGCTACGGATCCA     |
| 1_r                | [Cyanine3]TGGATCCGTAGCTCGATGACGTGGAAGGGAATGAC<br>GGTACGTAAACTGCTTGGCTCTATCTAGGTGGTCGTTGTG |
| 16_f               | [Btn]CACAAACGACCACCTAGATAGAGCCAAGCAGTTTACGTAC<br>CGTCATTCCCTTCCGGATCCACGAGCTACCGTCGTC     |
| 16_r               | [Cyanine3]GACGACGGTAGCTCGTGGATCCGGAAGGGAATGA<br>CGGTACGTAAACTGCTTGGCTCTATCTAGGTGGTCGTTGTG |
| 31_f               | [Btn]CACAAACGACCACCTAGATAGAGCCAAGCAGTTTACGTAG<br>GATCCTTCCCTTCCACGTCATCGAGCTACCGTCGTC     |
| 31_r               | [Cyanine3]GACGACGGTAGCTCGATGACGTGGAAGGGAAGGA<br>TCCTACGTAAACTGCTTGGCTCTATCTAGGTGGTCGTTGTG |
| 46_f               | [Btn]CACAAACGACCACCTAGATAGAGCGGATCCGTTTACGTAC<br>CGTCATTCCCTTCCACGTCATCGAGCTACCGTCGTC     |
| 46_r               | [Cyanine3]GACGACGGTAGCTCGATGACGTGGAAGGGAATGA<br>CGGTACGTAAACGGATCCGCTCTATCTAGGTGGTCGTTGTG |
| Btn_25BamHI1_f     | [Btn]CACAAACGACCACCTAGATGGATCCA                                                           |
| Cy3_25BamHI1_r     | [Cy3]TGGATCCATCTAGGTGGTCGTTGTG                                                            |
| B_f                | CACAACGACGGATCCCACCTAGAT                                                                  |
| B_r                | ATCTAGGTGGGATCCGTCGTTGTG                                                                  |
| B-GC_f             | CACAACGCCGGATCCGGCCTAGAT                                                                  |
| B-GC_r             | ATCTAGGCCGGATCCGGCCTAGAT                                                                  |
| B-GC*_f            | CACAACGCCTGATCCGGCCTAGAT                                                                  |
| B-GC*_r            | ATCTAGGCCGGATCAGGCCTAGAT                                                                  |
| scr_f              | CCGTCCAACAGCGAgGCTGATTAAAGAATTCCG                                                         |
| scr_r              | CGAATTCTTTAATCAGCcTCGCTGTTGGACGG                                                          |
| XPF_35_Btn_f       | [Btn]TTGCATCCTTCACAACGACCACCTAGATAGAGCCA                                                  |
| XPF_25_Cy3_r       | TGGCTCTATCTAGGTGGTCGTTGTG[Cy3]                                                            |
| XPF_35_f           | TTGCATCCTTCACAACGACCACCTAGATAGAGCCA                                                       |
| XPF_25_R           | TGGCTCTATCTAGGTGGTCGTTGTG                                                                 |
| XPF_HP             | CAGCGCTCGGTTTTTTTTTTTTTTTTTTTTCCGAGCGCTG                                                  |
| XPF_Yr             | TTTTTTTTTTCCGAGCGCTG                                                                      |
| XPF_Yf             | CAGCGCTCGGTTTTTTTTTTT                                                                     |

|                       |                                                                                                                        |
|-----------------------|------------------------------------------------------------------------------------------------------------------------|
| XPF_10f               | CAGCGCTCGG                                                                                                             |
| XPF_10r               | CCGAGCGCT                                                                                                              |
| Btn_10_f              | [Btn]GATAGAGCCA                                                                                                        |
| Cy3_10_r              | [Cy3]TGGCTCTATC                                                                                                        |
| Btn_11_f              | [Btn]AGATAGAGCCA                                                                                                       |
| Cy3_11_r              | [Cy3]TGGCTCTATCT                                                                                                       |
| Btn_12_f              | [Btn]TAGATAGAGCCA                                                                                                      |
| Cy3_12_r              | [Cy3]TGGCTCTATCTA                                                                                                      |
| Btn_13_f              | [Btn]CTAGATAGAGCCA                                                                                                     |
| Cy3_13_r              | [Cy3]TGGCTCTATCTAG                                                                                                     |
| Btn_14_f              | [Btn]CCTAGATAGAGCCA                                                                                                    |
| Cy3_14_r              | [Cy3]TGGCTCTATCTAGG                                                                                                    |
| Btn_15_f              | [Btn]ACCTAGATAGAGCCA                                                                                                   |
| Cy3_15_r              | [Cy3]TGGCTCTATCTAGGT                                                                                                   |
| Btn_25_f              | [Btn]CACAACGACCACCTAGATAGAGCCA                                                                                         |
| Cy3_25_r              | [Cy3]TGGCTCTATCTAGGTGGTCGTTGTG                                                                                         |
| BtnT_15_Cy3_15_BtnT_f | [5BioTinTEG]TT GCA TCC TTC ACA A[iCy3]C GAC CAC CTA GAT AG[3BioTEG]                                                    |
| BtnT_30_BtnT_r        | [5BioTinTEG]CTA TCT AGG TGG TCG TTG TGA AGG ATG CAA [3BioTEG]                                                          |
| BtnT_15_Cy3_15_f      | [5BioTinTEG]TT GCA TCC TTC ACA A[iCy3]C GAC CAC CTA GAT AG                                                             |
| 30_BtnT_r             | CTA TCT AGG TGG TCG TTG TGA AGG ATG CAA [3BioTEG]                                                                      |
| BtnT_15_Cy3_60_f      | [5BioTinTEG]TT GCA TCC TTC ACA A[iCy3]C GAC CAC CTA GAT AGA GCC AAG CAG TTT ACG TAC CGT CAT TCC CTT CCA CGT CAT CGA GC |
| 75_BtnT_r             | GCT CGA TGA CGT GGA AGG GAA TGA CGG TAC GTA AAC TGC TTG GCT CTA TCT AGG TGG TCG TTG TGA AGG ATG CAA [3BioTEG]          |
